# Supplementary material for: Rapid and sensitive detection of Salmonella enteritidis by a pre-concentrated immunochromatographic assay in a large-volume sample system
Source: Royal Society of Chemistry journal article supplement (doi:10.1039/c7ra11006e), 2017-01-01
Supplement: c7ra11006e1.pdf [file c7ra11006e1.pdf]

## Rapid and Sensitive Detection of *Salmonella enteritidis* by Pre-concentrated Immunochromatographic Assay in Large-volume Sample System

Miao-Lin Duan<sup>a</sup>, Yan-Mei Huang<sup>c</sup>, Song-Song Wu<sup>a</sup>, Guo-Qiang Li<sup>a</sup>  
Shu-Ying Wang<sup>a</sup>, Ming-Hui Chen<sup>a</sup>, Chun Wang<sup>a</sup>, Dao-Feng Liu<sup>b,\*</sup>, Cheng-Wei Liu<sup>b,\*</sup>, Wei-Hua Lai<sup>a,\*</sup>

<sup>a</sup> State Key Laboratory of Food Science and Technology, Nanchang University, 235, Nanjing East Road, Nanchang 330047, China

<sup>b</sup> Institute for Nutrition and Food Safety, Jiangxi Province Centre for Disease Control and Prevention, 555, Beijing East Road, Nanchang 330029, China

<sup>c</sup> Jiangxi YeLi Medical Device Co.,Ltd, 2799, Tianxiang Road, Nanchang 330008, China

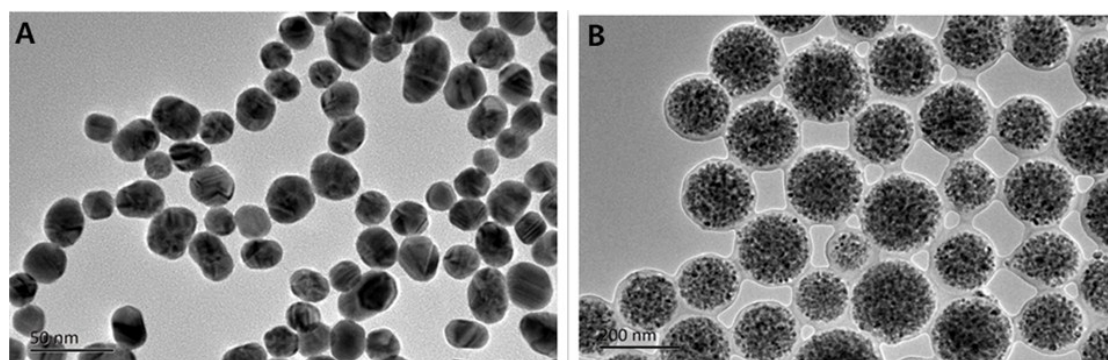

Figure S1. Transmission electron microscopy image of CG (A) and MNPs (B).

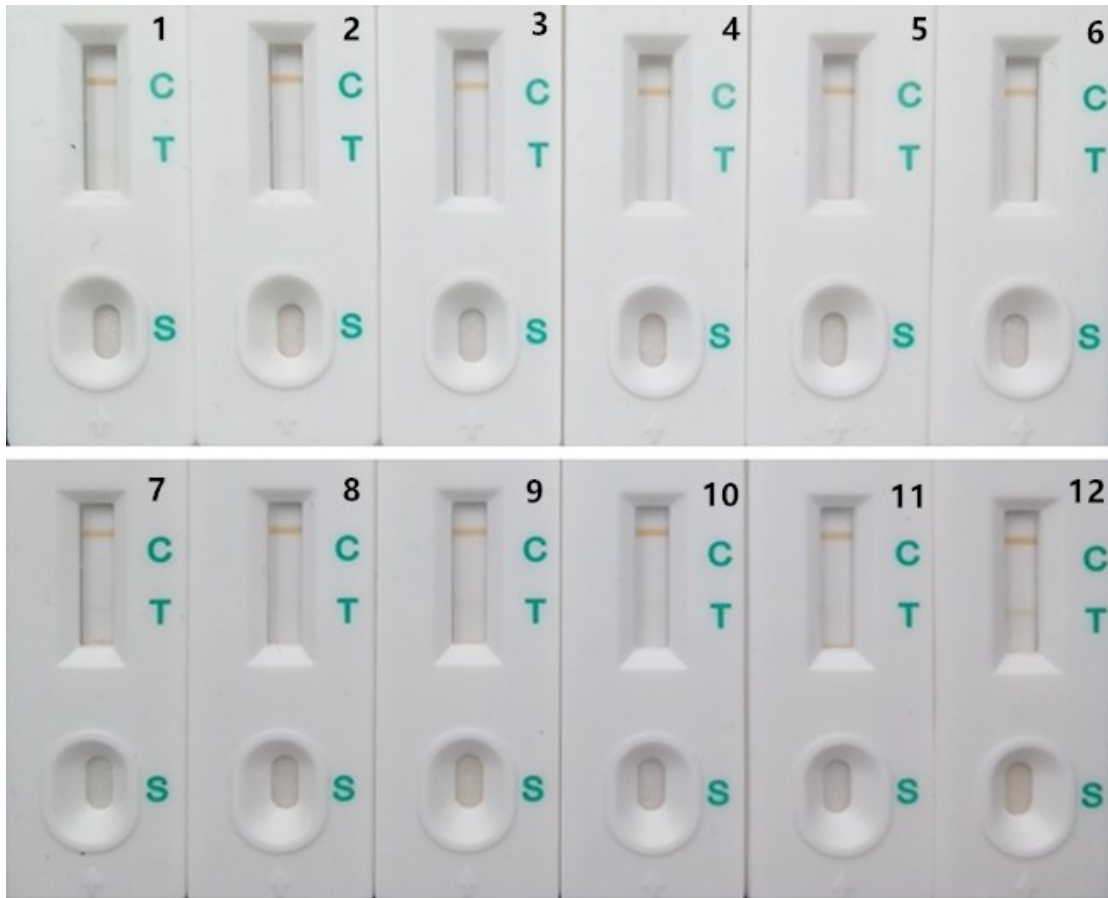

**Figure S2.** Results of specificity test for large-volume MNP-ICA. Nos. 1 and 2 are the control groups (PBS and LB). Nos. 3 to 11 are *Listeria welshimeri* (ATCC 35897), *Candida albicans* (ATCC 10231), *Bacillus subtilis* (BD 168), *Proteusbacillus vulgaris* (CMCC 49027), *Shigella flexneri* (CMCC 2457), *Enterobacter sakazakii* (CMCC 45407), *Pseudomonas aeruginosa* (CMCC 11997), *Escherichia coli* O157:H7 (ATCC 43888) and *Micrococcus luteus* (CMCC 28001), respectively. Nos. 12 is *Salmonella enteritidis* (ATCC 13076).

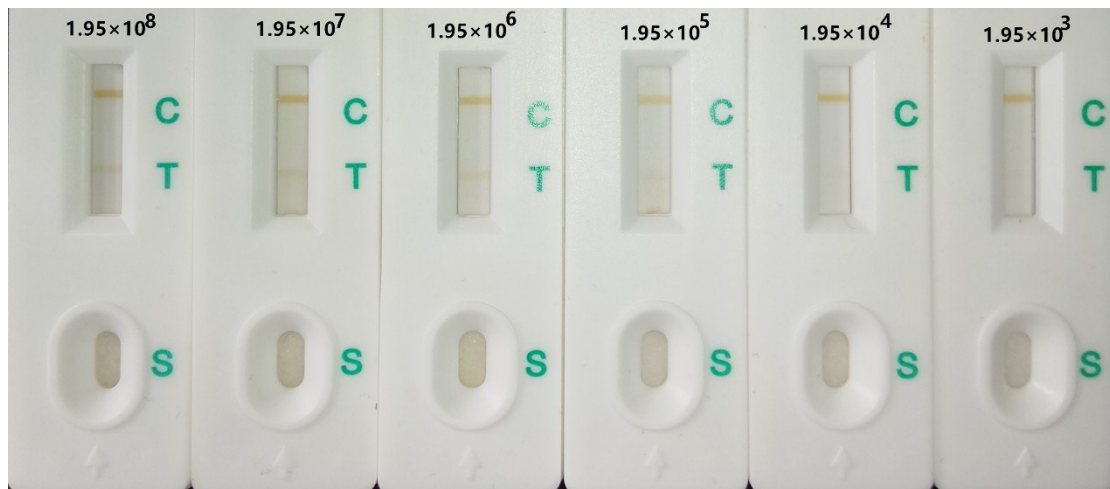

**Figure S3.** Detection of *S. enteritidis* in spiked milk matrix by large-volume MNP-ICA.
